# Supplementary material for: Comprehensive Analysis of Catalytic Characteristics and Molecular Mechanisms in Mutant Trametes versicolor Strains with Enhanced Laccase Activities
Source: MDPI journal article supplement (doi:10.3390/fermentation9120995), 2023-11-22
Supplement: s1 [file s1]

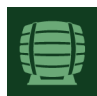

## Supplementary Materials

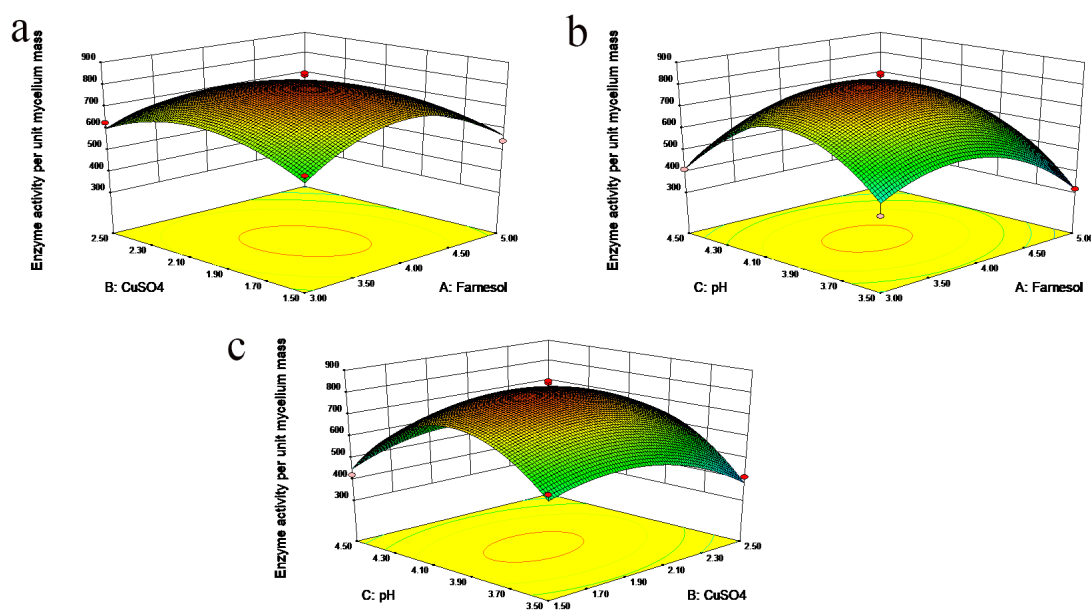

**Figure S1.** Response surface curves and contour plots of *Trametes versicolor* ATCC20869 under various conditions. (a) Response surface curves and contour plots of farnesol addition and copper sulfate addition; (b) Response surface curves and contour plots of farnesol addition and pH; (c) Response surface curves and contour plots of copper sulfate addition and pH.

**Table S1.** ANOVA for Response Surface Quadratic Model of *Trametes versicolor* ATCC20869.

| Source              | Sum of Squares        | df | Mean Square           | F Value | p-Value  |                 |
|---------------------|-----------------------|----|-----------------------|---------|----------|-----------------|
| Model               | 5.510×10 <sup>5</sup> | 9  | 61216.84              | 29.17   | < 0.0001 | significant     |
| A-Farnesol          | 23672.41              | 1  | 23672.41              | 11.28   | 0.0121   |                 |
| B-CuSO <sub>4</sub> | 12101.53              | 1  | 12101.53              | 5.77    | 0.0474   |                 |
| C-pH                | 330.61                | 1  | 330.61                | 0.16    | 0.7033   |                 |
| AB                  | 11115.03              | 1  | 11115.03              | 5.30    | 0.0549   |                 |
| AC                  | 4097.13               | 1  | 4097.13               | 1.95    | 0.2051   |                 |
| BC                  | 4790.03               | 1  | 4790.03               | 2.28    | 0.1746   |                 |
| A <sup>2</sup>      | 1.236×10 <sup>5</sup> | 1  | 1.236×10 <sup>5</sup> | 58.88   | 0.0001   |                 |
| B <sup>2</sup>      | 56083.00              | 1  | 56083.00              | 26.72   | 0.0013   |                 |
| C <sup>2</sup>      | 2.691×10 <sup>5</sup> | 1  | 2.691×10 <sup>5</sup> | 128.22  | < 0.0001 |                 |
| Residual            | 14692.61              | 7  | 2098.94               |         |          |                 |
| Lack of Fit         | 11879.33              | 3  | 3959.78               | 5.63    | 0.0642   | not significant |
| Pure Error          | 2813.28               | 4  | 703.32                |         |          |                 |

Notes: R-Squared = 0.9740, Adj R-Squared = 0.9406.
